# Supplementary material
Source: Springer Nature journal article supplement (https://www.springermedizin.de/resource/supplementary/12936_2014_3384_MOESM6_ESM.pdf/9545808)

A

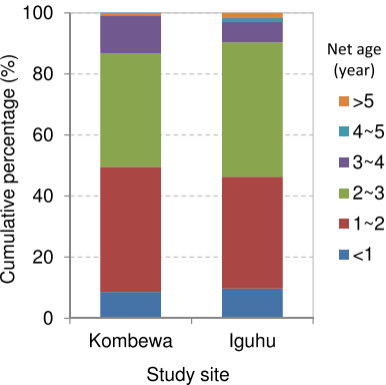

B

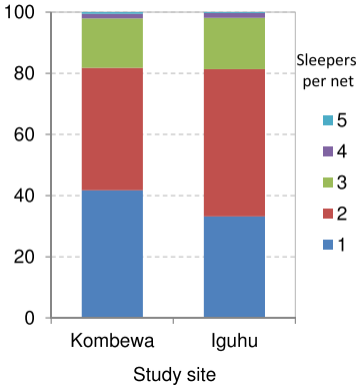

Supplement: MOESM6 [file 9545808]
